# Supplementary material for: Mechanism of 150-cavity formation in influenza neuraminidase
Source: PubMed Central journal article supplement — Nat Commun. 2011 Jul 12;2:388–. doi: 10.1038/ncomms1390 (PMC3144582; doi:10.1038/ncomms1390), 2011-07-12
Supplement: ncomms1390-s1.pdf [file ncomms1390-s1.pdf]

## Mechanism of 150-Cavity Formation in Influenza Neuraminidase

Rommie E. Amaro<sup>1</sup>, Robert V. Swift<sup>1</sup>, Lane Votapka<sup>1</sup>, Wilfred Li<sup>2</sup>, Ross C. Walker<sup>3</sup>, and Robin Bush<sup>4</sup>

<sup>1</sup> Department of Pharmaceutical Sciences, Computer Science, and Chemistry, University of California, Irvine, Irvine, CA, USA. <sup>2</sup> National Biomedical Computation Resource, University of California, San Diego, La Jolla, CA, USA. <sup>3</sup> Department of Chemistry and Biochemistry & San Diego Supercomputer Center, University of California, San Diego, La Jolla, CA, USA. <sup>4</sup> Department of Ecology and Evolution, University of California, Irvine, Irvine, CA, USA. Correspondence should be addressed to R.E.A. (ramaro@uci.edu)

### Supplementary Figures:

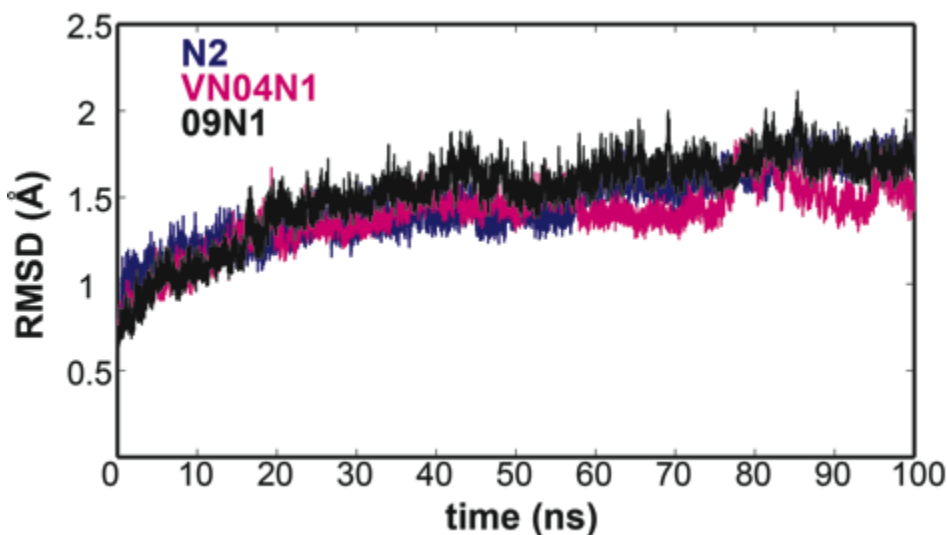

**Supplementary Figure S1:** The time series for the RMSD over alpha-carbon atoms for tetramer systems is shown for each 100 ns simulation (for reference, N2 is shown in blue, VN04N1 in pink, and 09N1 in black). The plot indicates stability of the simulated systems.

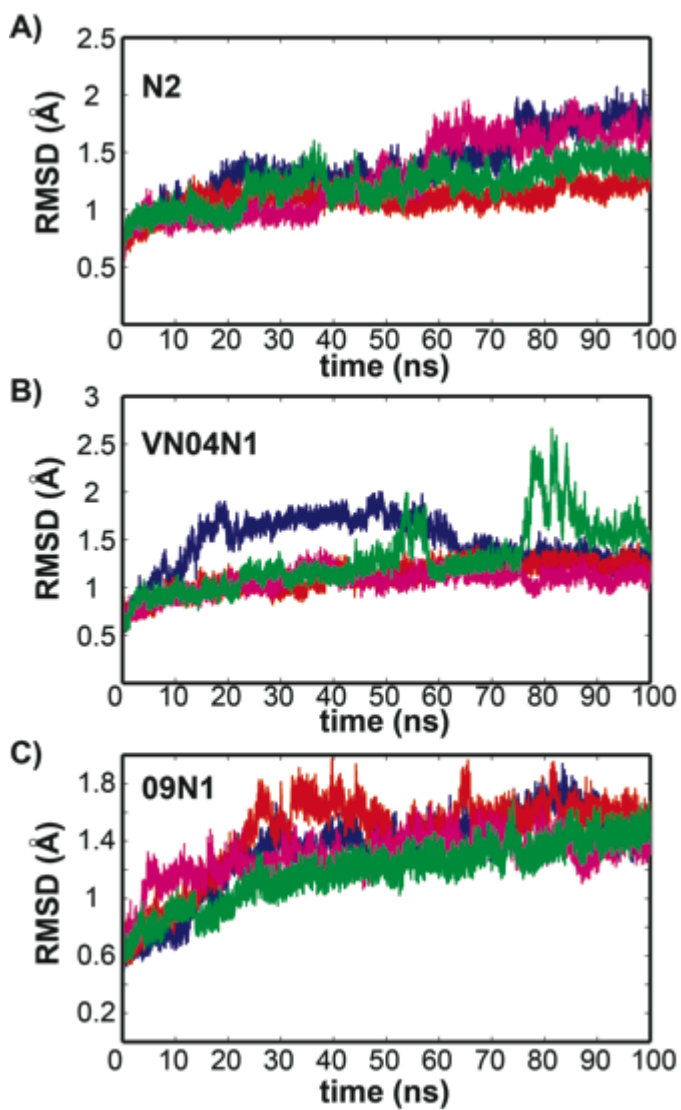

**Supplementary Figure S2:** The time series for the per monomer RMSD, as computed over the alpha-carbons, is shown for the N2, VN04N1, and 09N1 systems. For all systems, chain A is shown in blue, chain B in red, chain C in fuschia, and chain D in green.

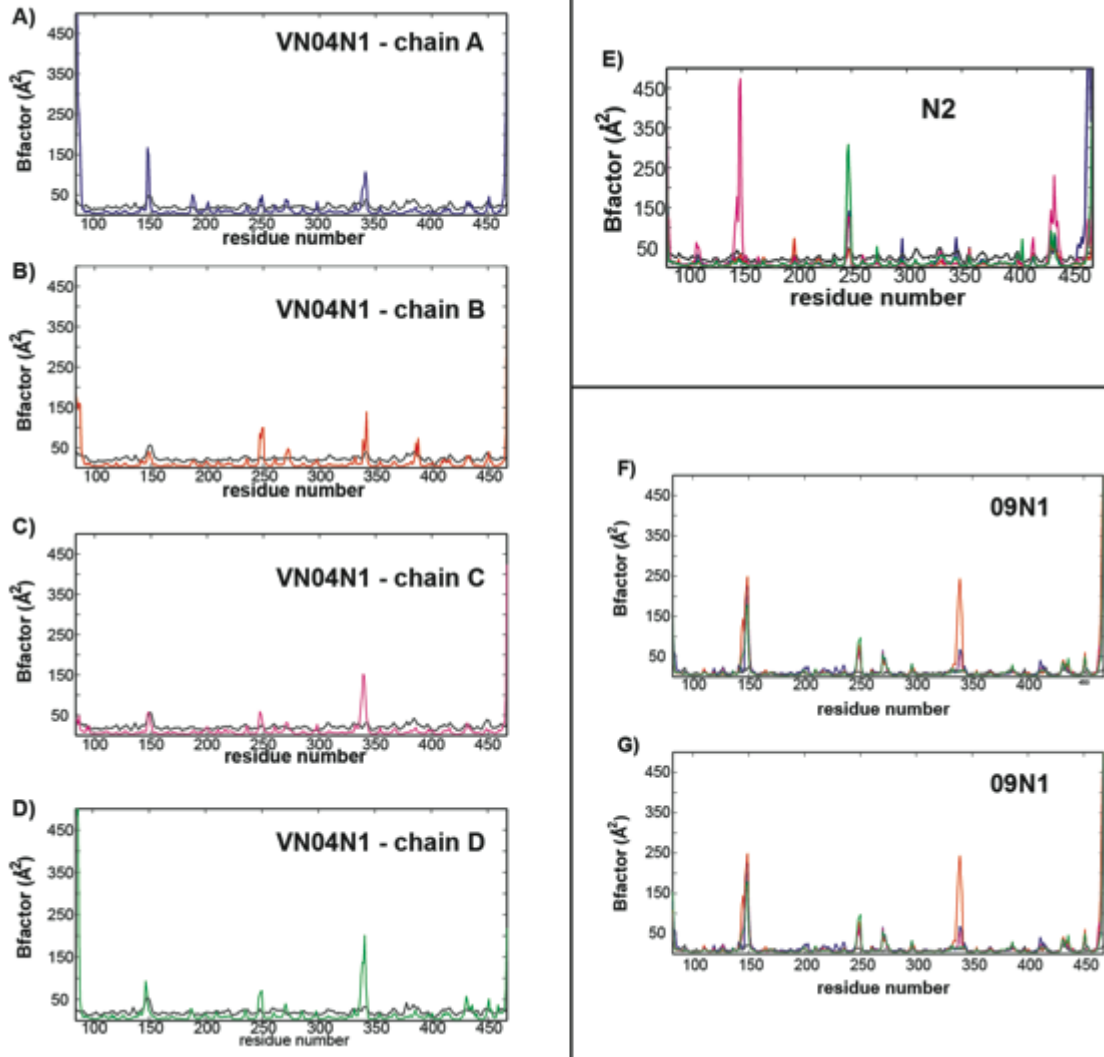

**Supplementary Figure S3:** Experimental and simulation-derived B-factors. Crystal B-factors shown in black throughout. MD-derived B-factors shown in blue, orange, fuchsia, and green for tetramer chains A, B, C, D, respectively. A-D) VN04N1 PDB 2HTY is a tetramer; B-factors for each chain are compared individually. E) N2 PDB 1NN2 has one chain; all 4 MD chains are shown, F-G) 09N1 PDB 3NSS has 2 chains; all 4 MD monomers are shown against chain A (in F) and chain B (in G).

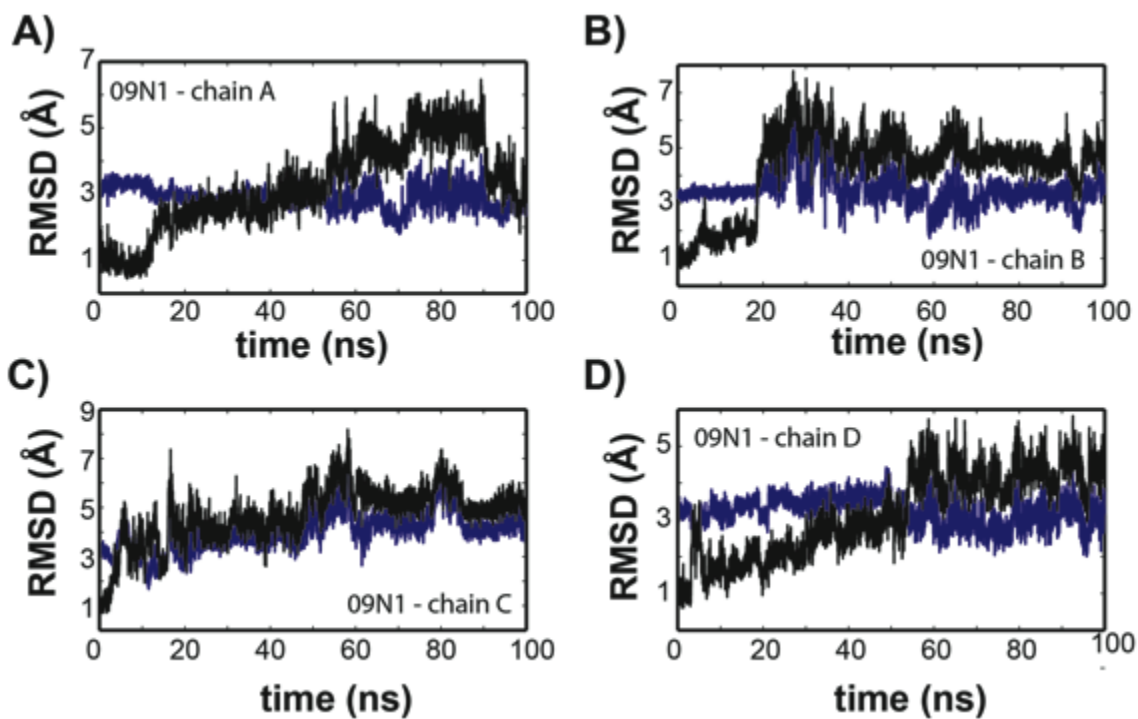

**Supplementary Figure S4:** The structural deviations in the 150-loop (residues 146-152) are shown for the 09N1 system. 150-loop RMSD from the open- (shown in blue) and closed- (shown in black) 150-loop crystal structures (2HTY and 2HU4, respectively) indicate structural deviations from the experimentally resolved data. Locations where the two lines cross over indicate a loop “switching event” (from open to closed, or closed to open).

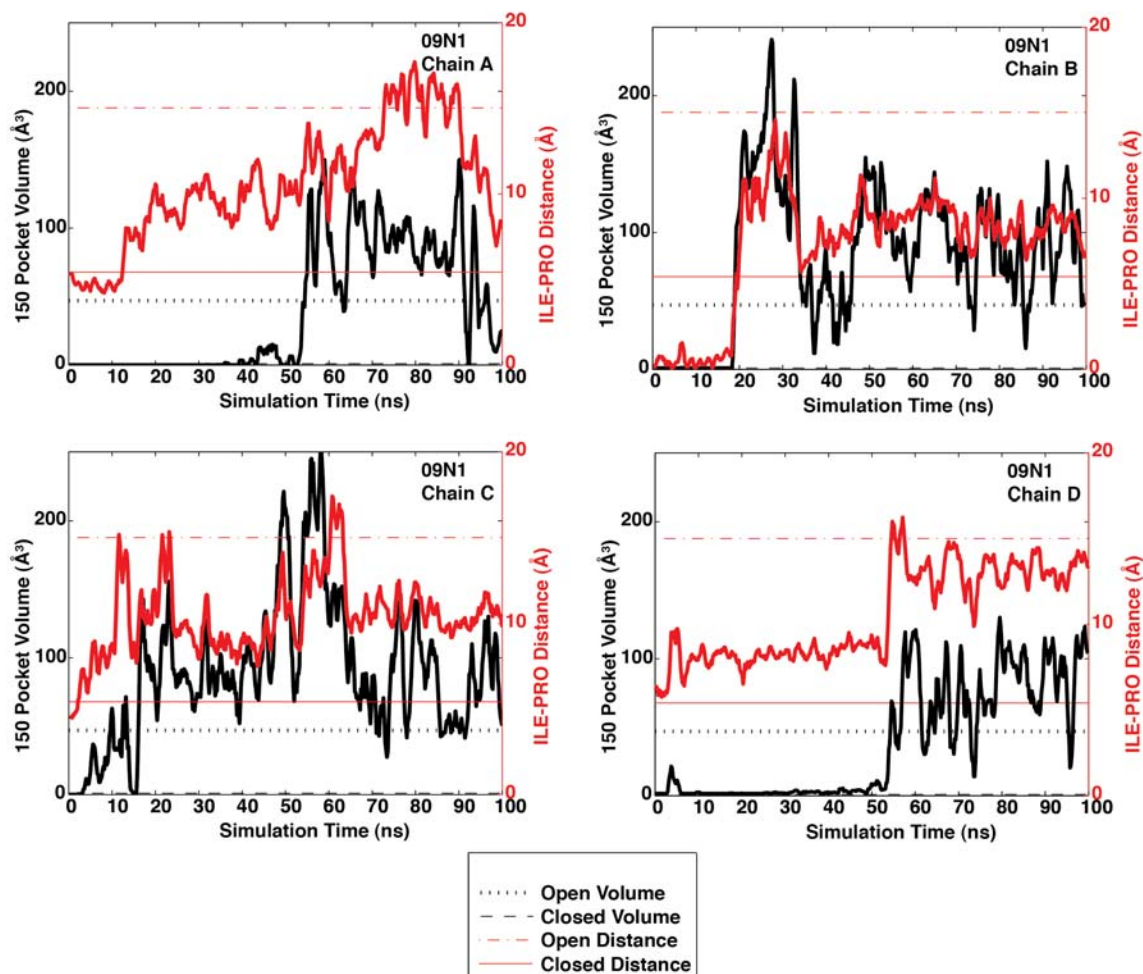

**Supplementary Figure S5:** Time series analysis of 150-cavity volume and width for 09N1 system. The distance between alpha carbon of residue 431 (Pro431 in 09N1) and the closest sidechain carbon of residue 149 (Ile149 in 09N1) is computed and shown in red and the right-side y-axis. On the left side y-axis, the volume of the 150-cavity is computed over the course of simulation. Each plot represents a chain of the neuraminidase tetramer (A-D).

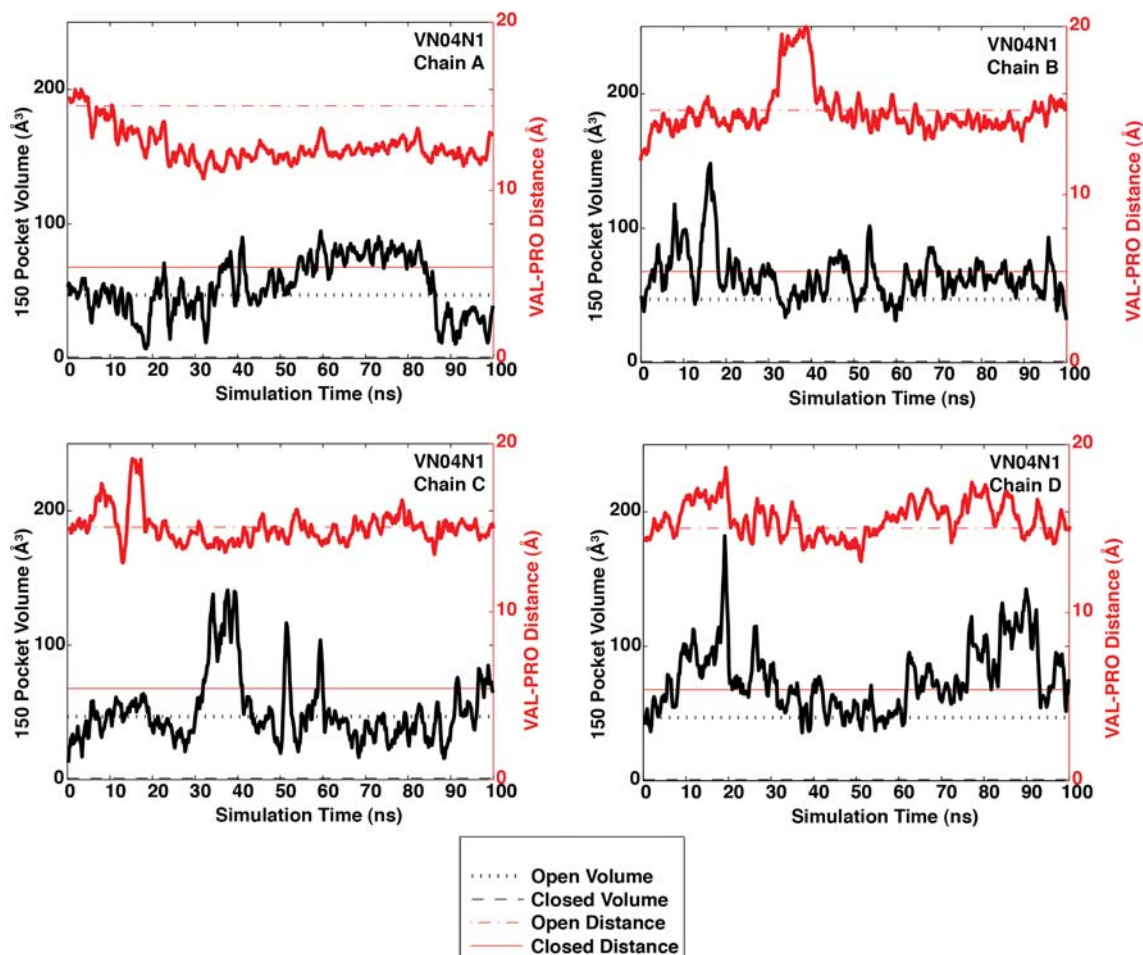

**Supplementary Figure S6:** Time series analysis of 150-cavity volume and width for VN04N1 system. The distance between alpha carbon of residue 431 (Pro431 in VN04N1) and the closest sidechain carbon of residue 149 (Val149 in VN04N1) is computed and shown in red and the right-side y-axis. On the left side y-axis, the volume of the 150-cavity is computed over the course of simulation. Each plot represents a chain of the neuraminidase tetramer (A-D).

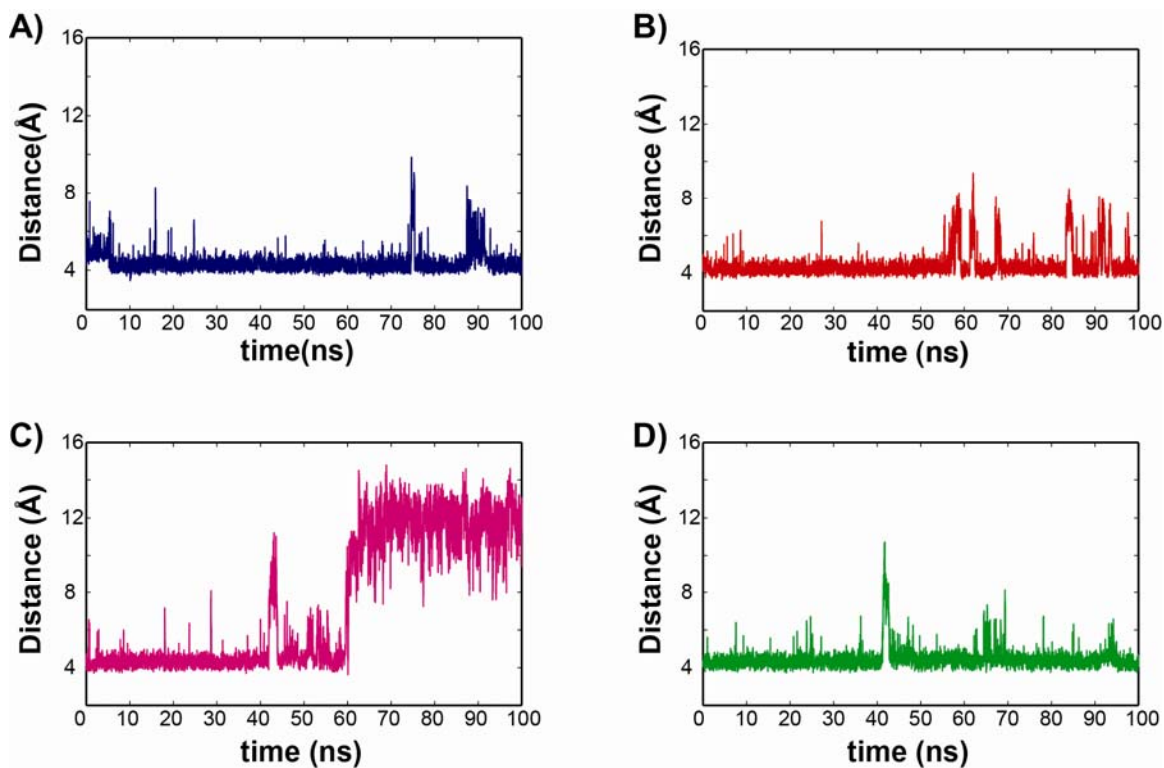

**Supplementary Figure S7:** Time series plots the key salt bridge that controls 150-cavity formation in the neuraminidase enzymes. The heavy atom distance between residues Asp147 and His150 is shown for all monomers (chains A-D) of the N2 simulation. In Chain C, the salt bridge breaks and does not reform after 60 ns.

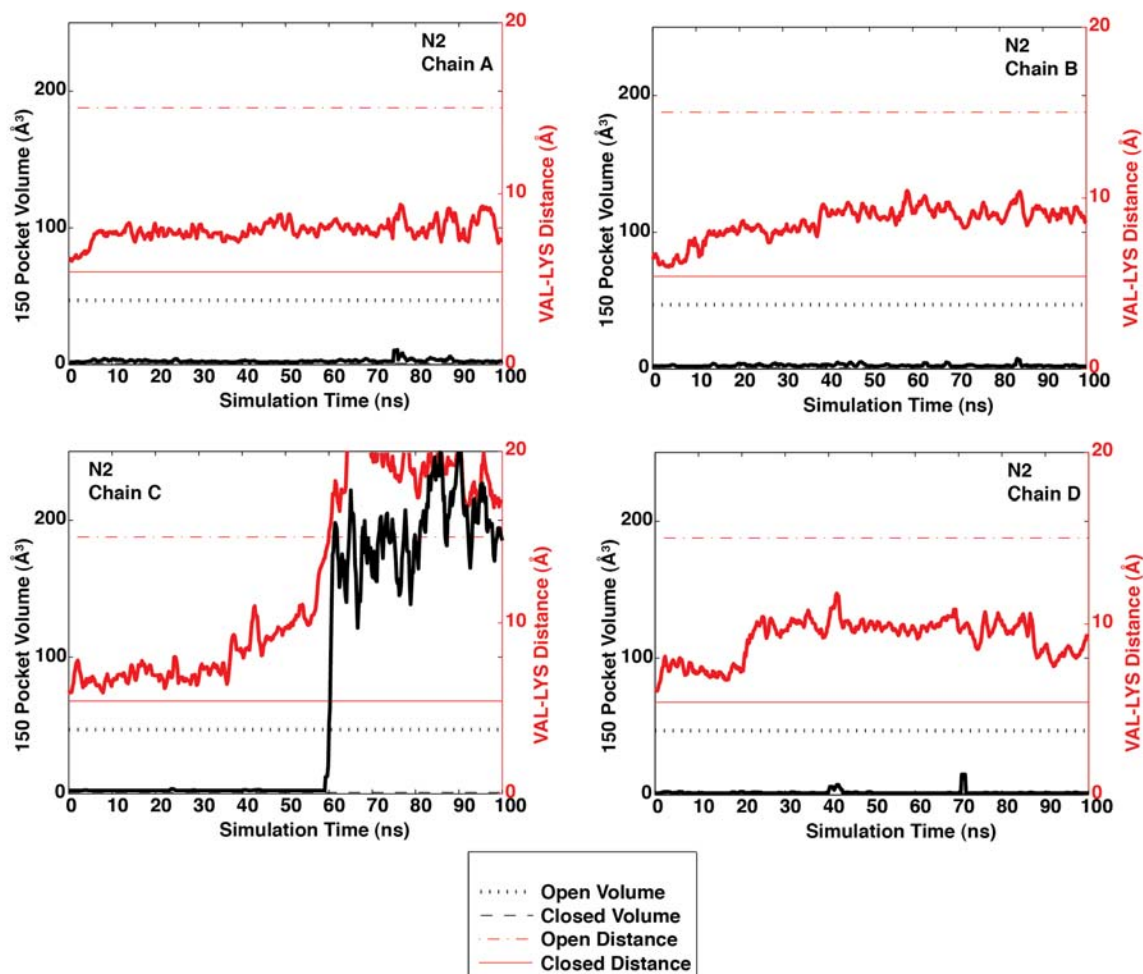

**Supplementary Figure S8:** Time series analysis of 150-cavity volume and width for N2 system. The distance between alpha carbon of residue 431 (Lys431 in N2) and the closest sidechain carbon of residue 149 (Val149 in N2) is computed and shown in red and the right-side y-axis. On the left side y-axis, the volume of the 150-cavity is computed over the course of simulation. Each plot represents a chain of the neuraminidase tetramer (A-D).



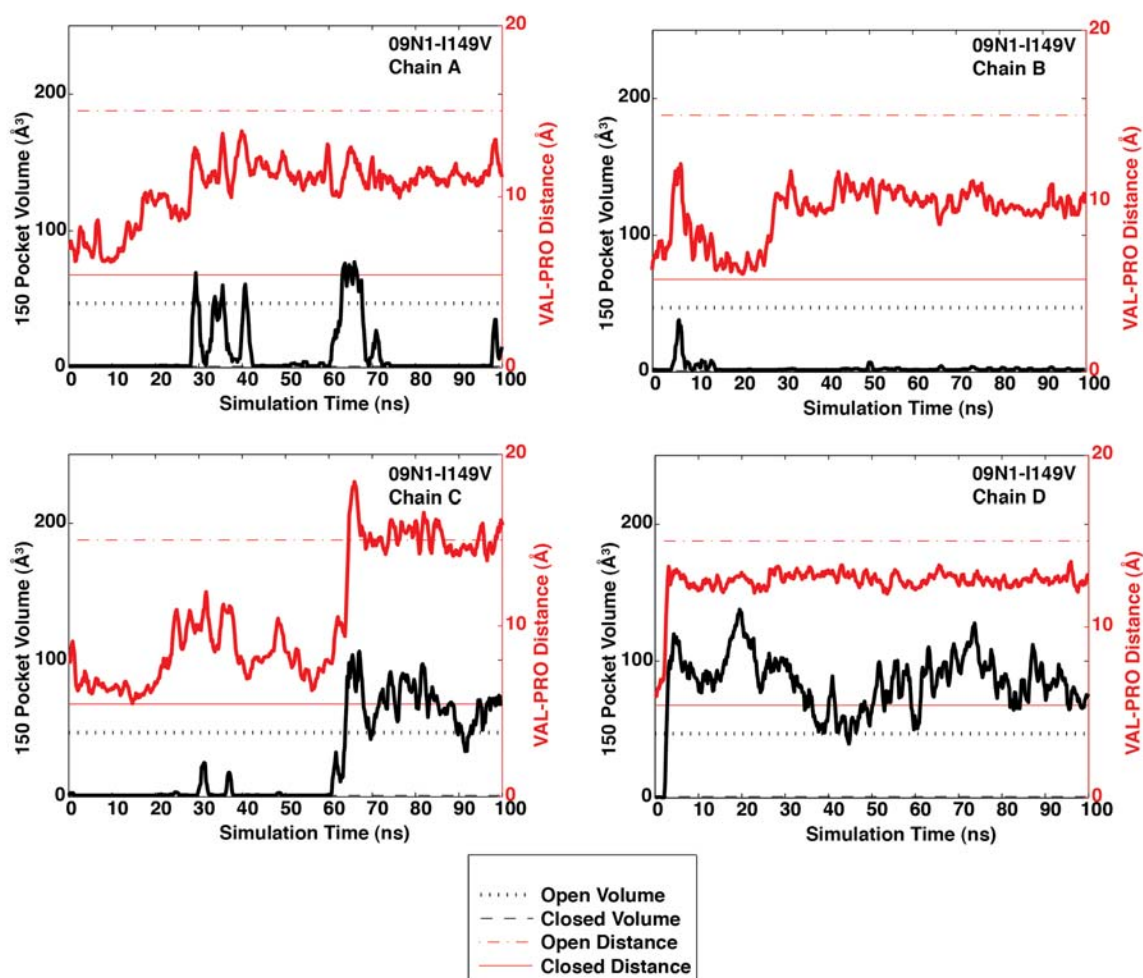

**Supplementary Figure S9:** Time series analysis of 150-cavity volume and width for 09N1\_I149V system. The distance between alpha carbon of residue 431 (Pro431 in 09N1\_I149V) and the closest sidechain carbon of residue 149 (Val149 in 09N1\_I149V) is computed and shown in red and the right-side y-axis. On the left side y-axis, the volume of the 150-cavity is computed over the course of simulation. Each plot represents a chain of the neuraminidase tetramer (A-D).

### Supplementary Tables:

| system name | crystal structure | strain               | Initial 150-loop state | simulation time (ns) | no. of atoms |
|-------------|-------------------|----------------------|------------------------|----------------------|--------------|
| N2          | 1nn2              | A/Tokyo/3/67         | Closed                 | 100                  | 151,895      |
| 09N1        | 3nss              | A/California/04/2009 | Closed                 | 100                  | 165,171      |
| 09N1_I149V  | 3nss*             | A/California/mutant* | Closed                 | 100                  | 156,338      |
| VN04N1      | 2hty              | A/Vietnam/1203/04    | Open                   | 100                  | 112,311      |

**Supplementary Table S1:** Description of simulated systems. System name, crystal structure PDB identifier, human strain isolate description, colloquial system description, total simulation time for tetramer simulation, and total number of atoms are shown for each system.

| <b>system</b> | <b>cluster 1</b>  | <b>cluster 2</b>  | <b>cluster 3</b>  | <b>no. of clusters</b> |
|---------------|-------------------|-------------------|-------------------|------------------------|
| N2            | 58.8%<br>(closed) | 16.7%<br>(closed) | 6.8%<br>(open)    | 24                     |
| VN04N1        | 68.9%<br>(open)   | 19.4%<br>(open)   | 11.6%<br>(open)   | 14                     |
| 09N1          | 33.4%<br>(closed) | 22.4%<br>(open)   | 13.7%<br>(open)   | 25                     |
| 09N1_I149V    | 46.9%<br>(closed) | 24.8%<br>(open)   | 15.2%<br>(closed) | 14                     |

**Supplementary Table S2:** RMSD-based clustering results. System name, percent population in the three most dominant clusters and open or closed 150-cavity designation, and the total number of clusters are shown.

**Supplementary Table S3:** 150-cavity volume for all NA crystal structures (with hydrogen atoms added) and the 3 most dominant cluster structures from the simulations. Structures and volumes correspond to Figure 1 in the main text.

| <b>System</b>              | <b>Volume (Å<sup>3</sup>)</b> | <b>Open/Closed characterization</b> |
|----------------------------|-------------------------------|-------------------------------------|
| N2 – crystal structure     | 0                             | Closed                              |
| N2 MD cluster 1            | 0                             | Closed                              |
| N2 MD cluster 2            | 0                             | Closed                              |
| N2 MD cluster 3            | 284                           | Open                                |
| VN04N1 – crystal structure | 36                            | Open                                |
| VN04N1 MD cluster 1        | 53                            | Open                                |
| VN04N1 MD cluster 2        | 136                           | Open                                |
| VN04N1 MD cluster 3        | 65                            | Open                                |
| 09N1 crystal structure     | 0                             | Closed                              |
| 09N1 MD cluster 1          | 0                             | Closed                              |
| 09N1 MD cluster 2          | 77                            | Open                                |
| 09N1 MD cluster 3          | 143                           | Open                                |
| 09N1_I149V minimized       | 0                             | Closed                              |
| 09N1_I149V MD Cluster 1    | 0                             | Closed                              |
| 09N1_I149V MD Cluster 2    | 146                           | Open                                |
| 09N1_I149V MD Cluster 2    | 1                             | Closed                              |
